# Supplementary material for: ZnS nanoparticles as an efficient recyclable heterogeneous catalyst for one-pot synthesis of 4-substituted-1,5-benzodiazepines
Source: Royal Society of Chemistry journal article supplement (doi:10.1039/c4nj01893a), 2014-11-20
Supplement: c4nj01893a1.pdf [file c4nj01893a1.pdf]

### Supplementary Data:

3,3-dimethyl-2,3,4,5,10,11-hexahydro-11-[phenyl]-1H-dibenzo[b,e][1,4]diazepin-1-one(**3a**):

Pale green solid

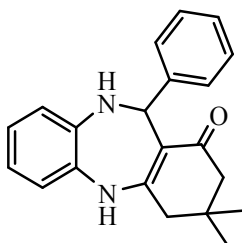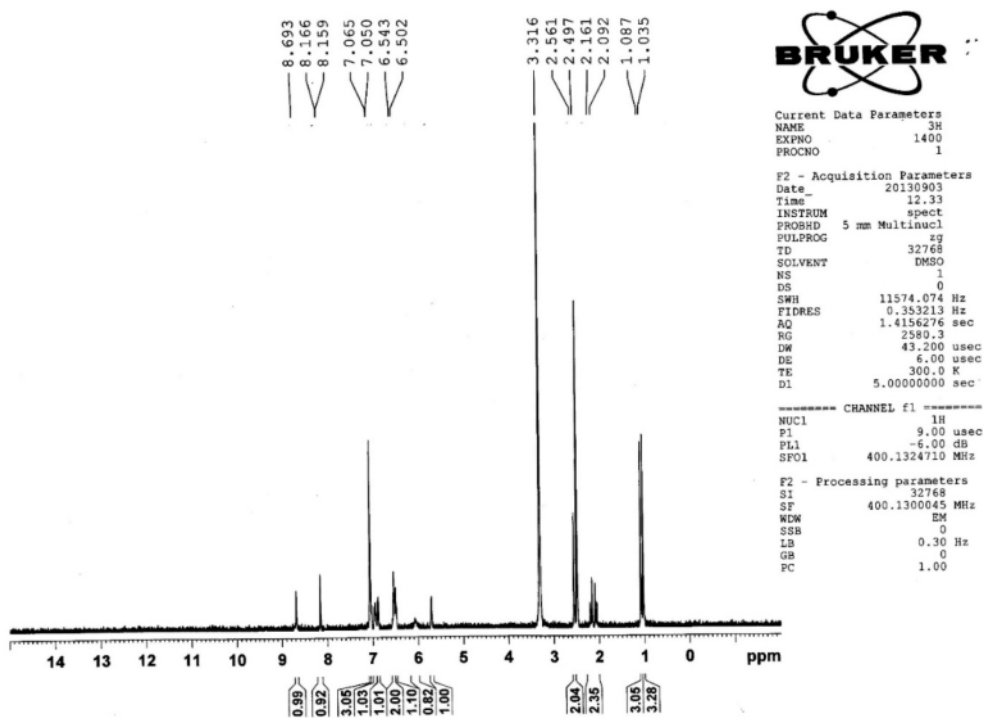

<sup>1</sup>H NMR Spectrum

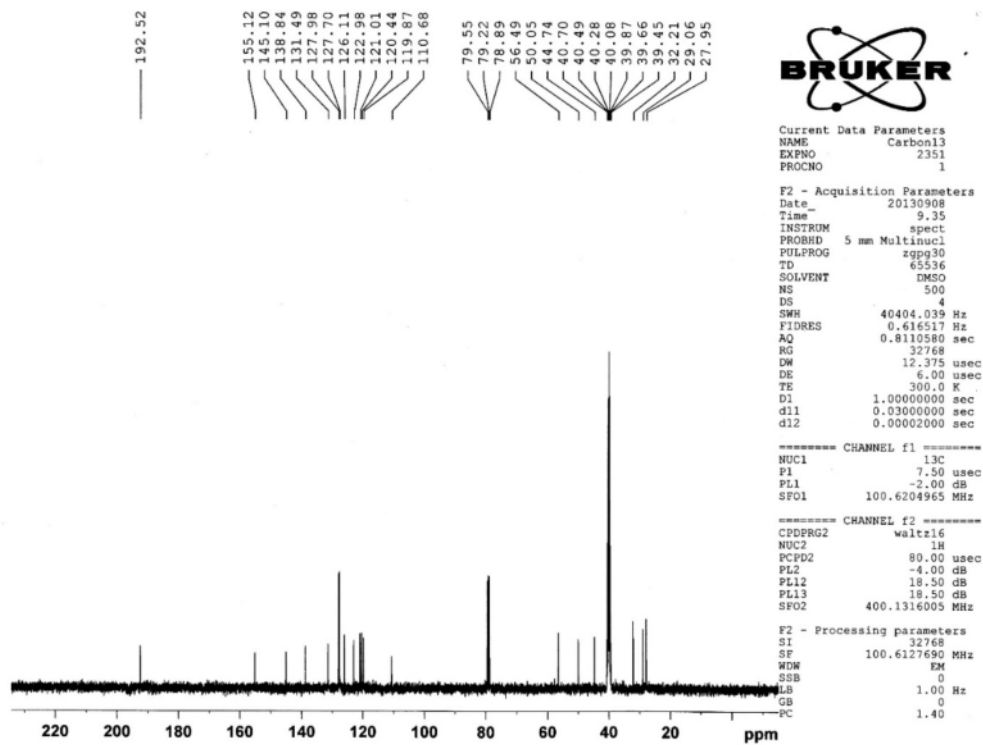

<sup>13</sup>C NMR Spectrum

3,3-dimethyl-2,3,4,5,10,11-hexahydro-11-[(4-nitro)phenyl]-1H-dibenzo[b,e][1,4]diazepin-1-one(**3b**):

Yellow solid

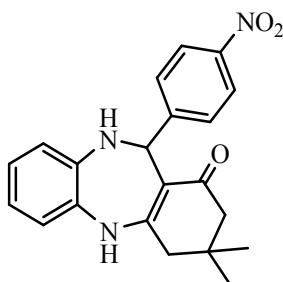

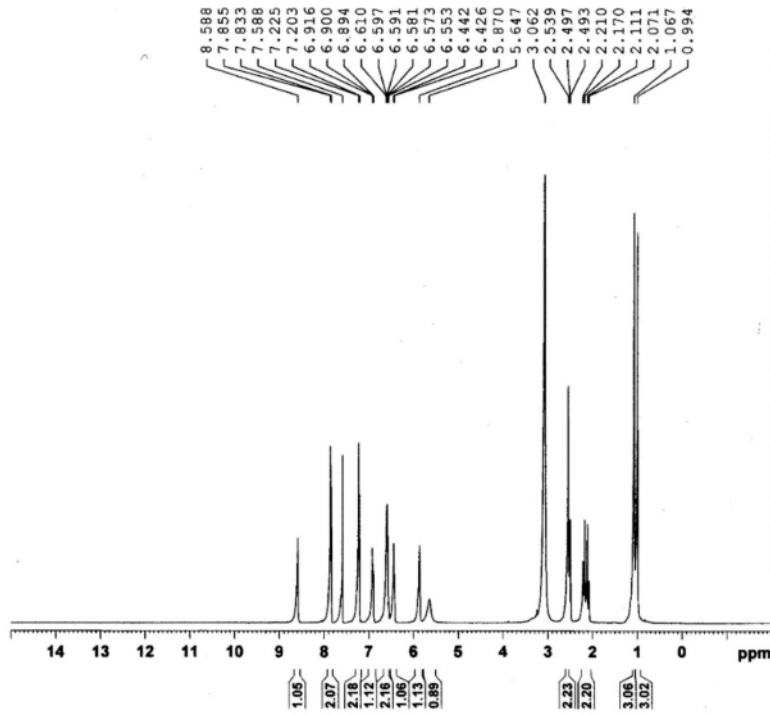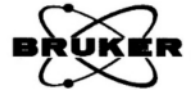

Current Data Parameters  
 NAME 3H  
 EXPNO 1214  
 PROCNO 1

F2 - Acquisition Parameters  
 Date\_ 20130731  
 Time 10.18  
 INSTRUM spect  
 PROBHD 5 mm Multinucl  
 PULPROG zg  
 TD 32768  
 SOLVENT DMSO  
 NS 16  
 DS 0  
 SWH 11574.074 Hz  
 FIDRES 0.353213 Hz  
 AQ 1.4156276 sec  
 RG 256  
 DW 43.200 usec  
 DE 6.00 usec  
 TE 300.0 K  
 D1 5.00000000 sec

----- CHANNEL f1 -----  
 NUC1 1H  
 P1 9.00 usec  
 PL1 -6.00 dB  
 SFO1 400.1324710 MHz

F2 - Processing parameters  
 SI 32768  
 SF 400.1300045 MHz  
 WDW EM  
 SSB 0  
 LB 0.30 Hz  
 GB 0  
 PC 1.00

<sup>1</sup>H NMR Spectrum

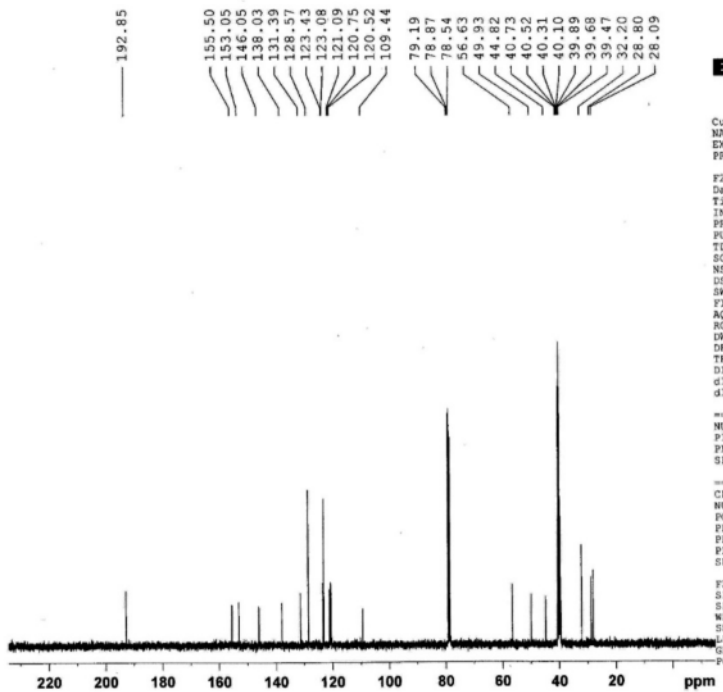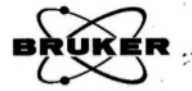

Current Data Parameters  
 NAME Carbon13  
 EXPNO 2292  
 PROCNO 1

F2 - Acquisition Parameters  
 Date\_ 20130731  
 Time 12.39  
 INSTRUM spect  
 PROBHD 5 mm Multinucl  
 PULPROG zgpg30  
 TD 65536  
 SOLVENT DMSO  
 NS 500  
 DS 4  
 SWH 40404.039 Hz  
 FIDRES 0.616517 Hz  
 AQ 0.8110580 sec  
 RG 32768  
 DW 12.375 usec  
 DE 6.00 usec  
 TE 300.0 K  
 D1 1.00000000 sec  
 d11 0.03000000 sec  
 d12 0.00002000 sec

----- CHANNEL f1 -----  
 NUC1 13C  
 P1 7.50 usec  
 PL1 -2.00 dB  
 SFO1 100.6204965 MHz

----- CHANNEL f2 -----  
 CPOPRG2 waltz16  
 NUC2 1H  
 PCPD2 80.00 usec  
 PL2 -4.00 dB  
 PL12 18.50 dB  
 PL13 18.50 dB  
 SFO2 400.1316005 MHz

F2 - Processing parameters  
 SI 32768  
 SF 100.6127690 MHz  
 WDW EM  
 SSB 0  
 LB 1.00 Hz  
 GB 0  
 PC 1.40

<sup>13</sup>C NMR Spectrum

3,3-dimethyl-2,3,4,5,10,11-hexahydro-11-[(2-nitro)phenyl]-1H-dibenzo[b,e][1,4]diazepin-1-one(3c):

Orange solid

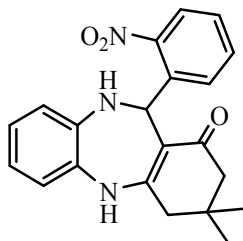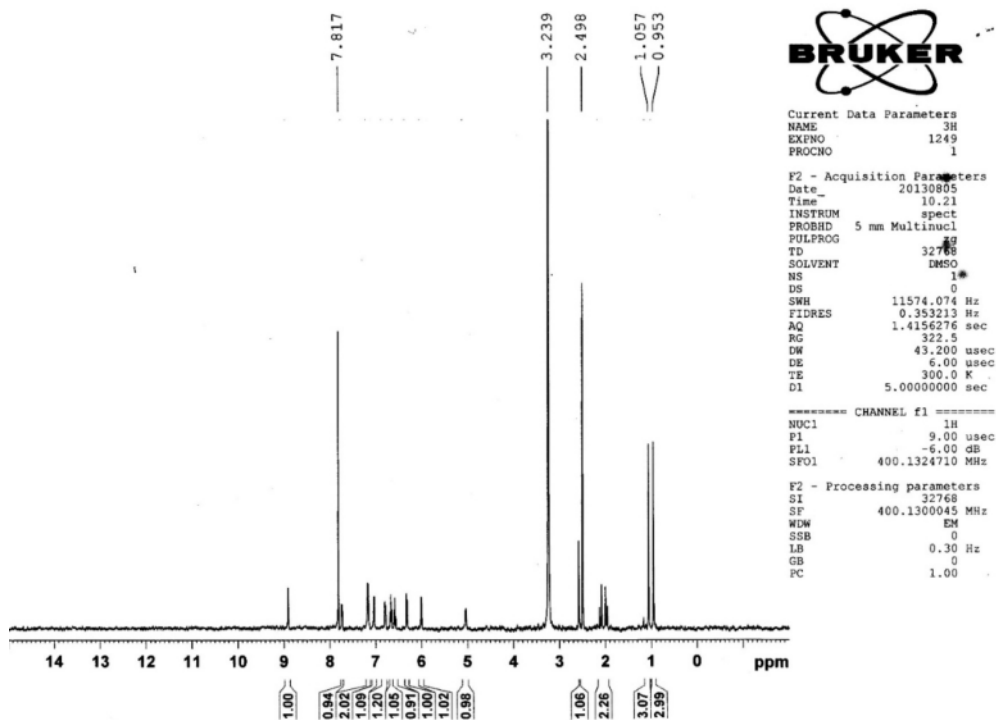

<sup>1</sup>H NMR Spectrum

3,3-dimethyl-2,3,4,5,10,11-hexahydro-11-[(3-nitro)phenyl]-1H-dibenzo[b,e][1,4]diazepin-1-one(3d):

Pale yellow solid

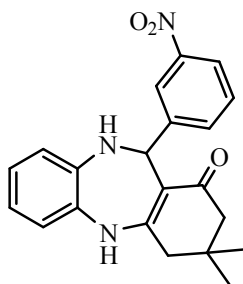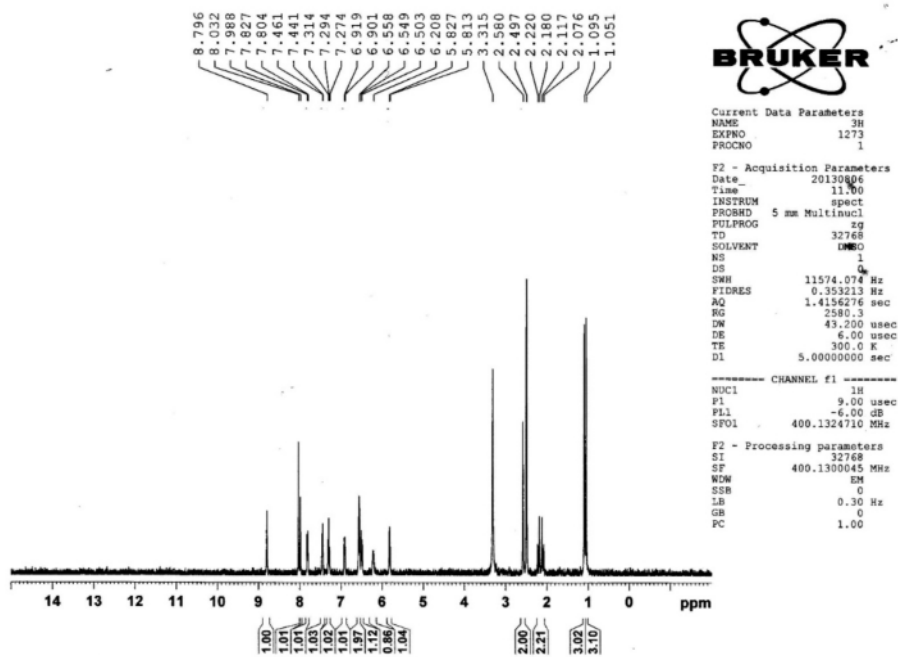

<sup>1</sup>H NMR Spectrum

3,3-dimethyl-2,3,4,5,10,11-hexahydro-11-[(4-chloro)phenyl]-1H-dibenzo[b,e][1,4]diazepin-1-one(**3e**):

Pale green solid

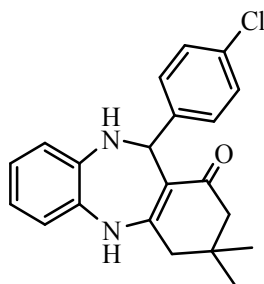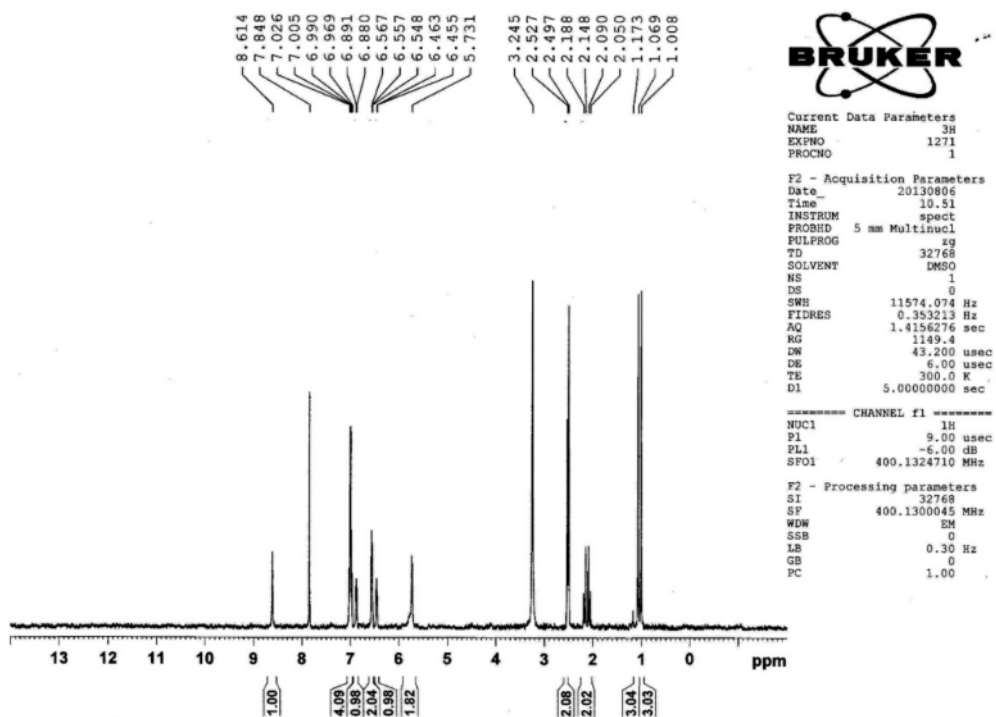

<sup>1</sup>H NMR Spectrum

3,3-dimethyl-2,3,4,5,10,11-hexahydro-11-[(2-chloro)phenyl]-1H-dibenzo[b,e][1,4]diazepin-1-one(**3f**):

White solid

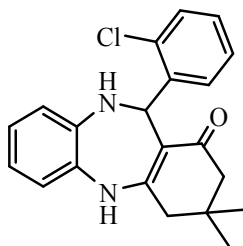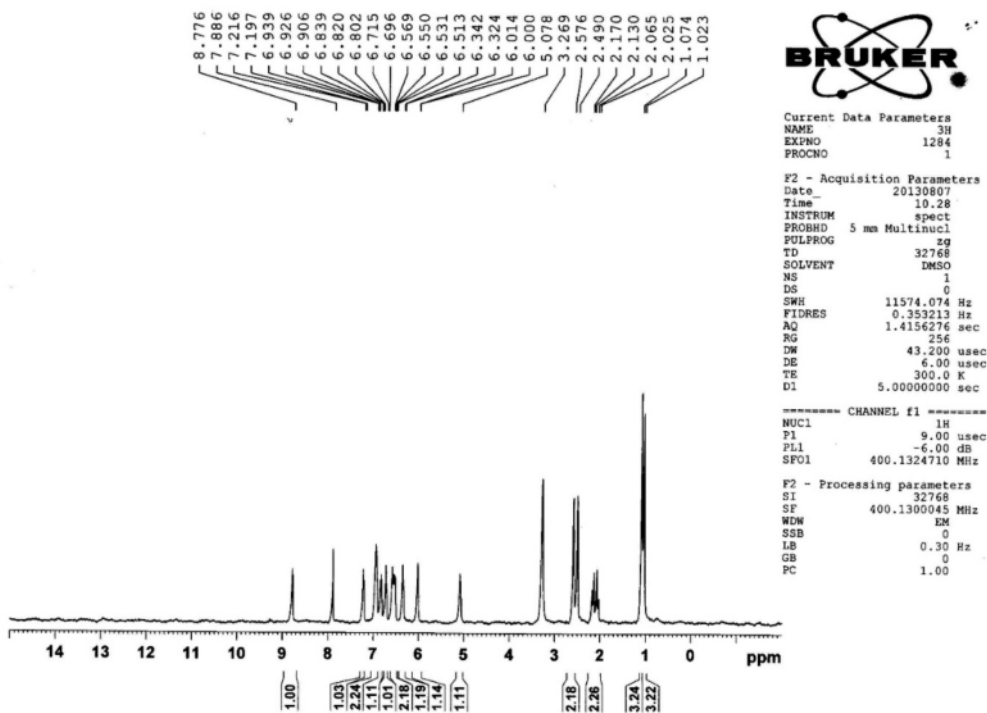

<sup>1</sup>H NMR Spectrum

3,3-dimethyl-2,3,4,5,10,11-hexahydro-11-[(2,3-dichloro)phenyl]-1H-dibenzo[b,e][1,4]diazepin-1-one(**3g**):

Pale green solid

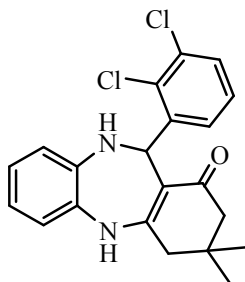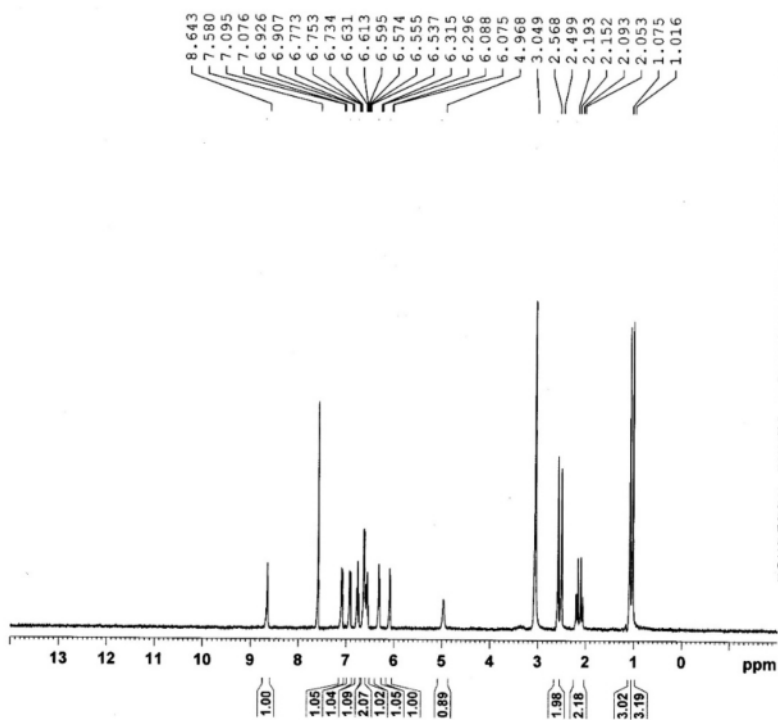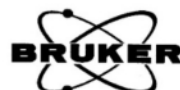

Current Data Parameters  
 NAME 3H  
 EXPNO 1244  
 PROCNO 1

F2 - Acquisition Parameters  
 Date\_ 20130803  
 Time 12.27  
 INSTRUM spect  
 PROBHD 5 mm Multinucl  
 PULPROG zg  
 TD 32768  
 SOLVENT DMSO  
 NS 1  
 DS 0  
 SWH 11574.074 Hz  
 FIDRES 0.353213 Hz  
 AQ 1.4156276 sec  
 RG 456.1  
 DW 43.200 usec  
 DE 6.00 usec  
 TE 300.0 K  
 D1 5.00000000 sec

----- CHANNEL f1 -----  
 NUC1 1H  
 P1 9.00 usec  
 PL1 -6.00 dB  
 SFO1 400.1324710 MHz

F2 - Processing parameters  
 SI 32768  
 SF 400.1300045 MHz  
 WDW EM  
 SSB 0  
 LB 0.30 Hz  
 GB 0  
 PC 1.00

<sup>1</sup>H NMR Spectrum



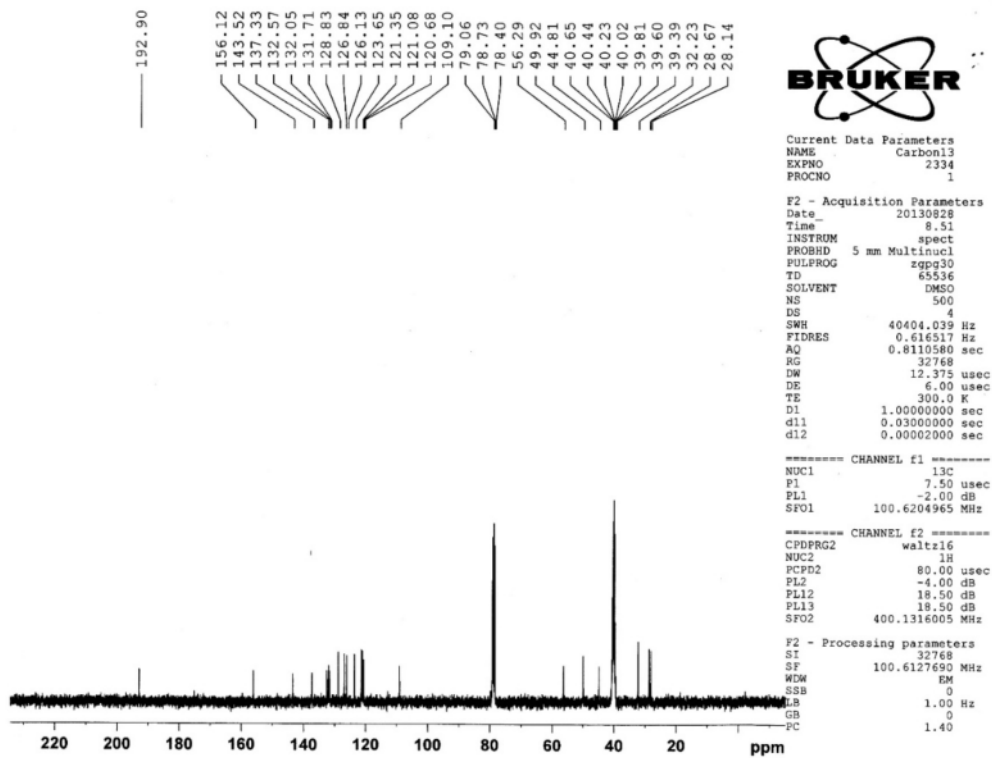

<sup>13</sup>C NMR Spectrum

File : C:\MSDCHEM\4\DATA\64013570.D  
 Operator :  
 Acquired : 4 Jan 1980 1:57 using AcqMethod TEST ARI  
 Instrument : Instrumen  
 Sample Name: M8  
 Misc Info :  
 Vial Number: 1

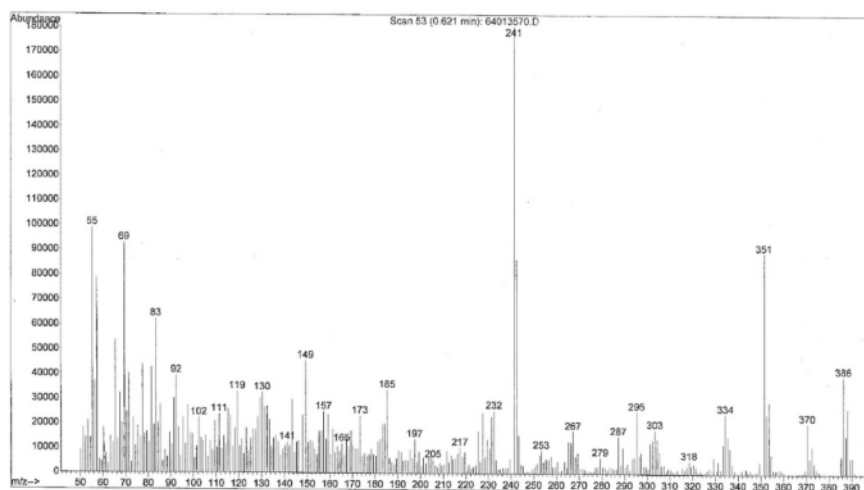

EI-MASS Spectrum

3,3-dimethyl-2,3,4,5,10,11-hexahydro-11-[(2,4-dichloro)phenyl]-1H-dibenzo[b,e][1,4]diazepin-1-one(**3h**):

Pale green solid

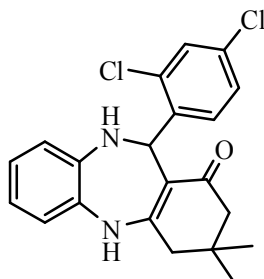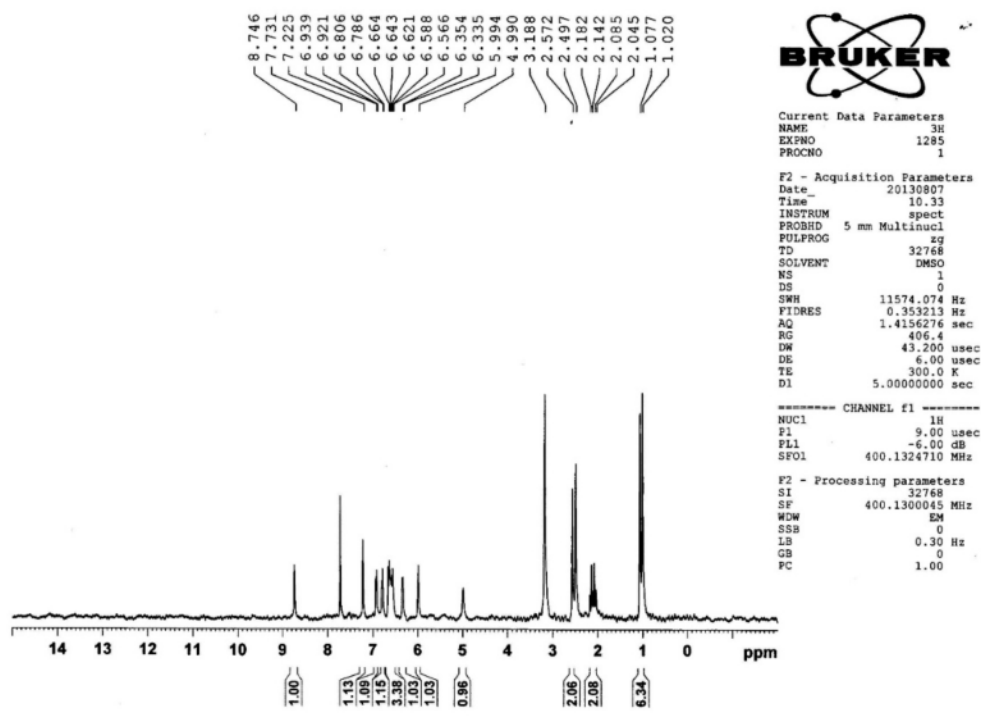

<sup>1</sup>H NMR Spectrum

3,3-dimethyl-2,3,4,5,10,11-hexahydro-11-[(4-chloro-3-nitro)phenyl]-1H-dibenzo[b,e][1,4]diazepin-1-one(**3i**):

Pale yellow solid

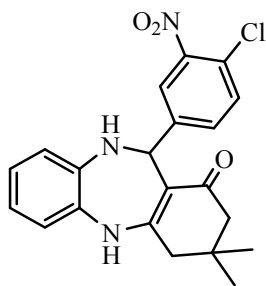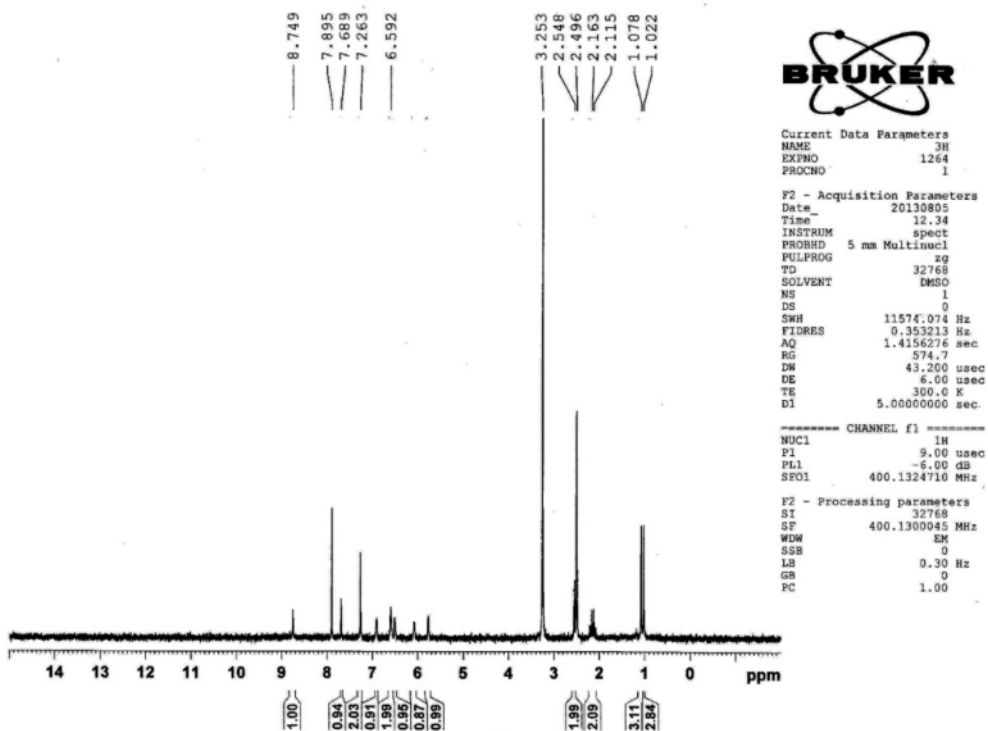

<sup>1</sup>H NMR Spectrum

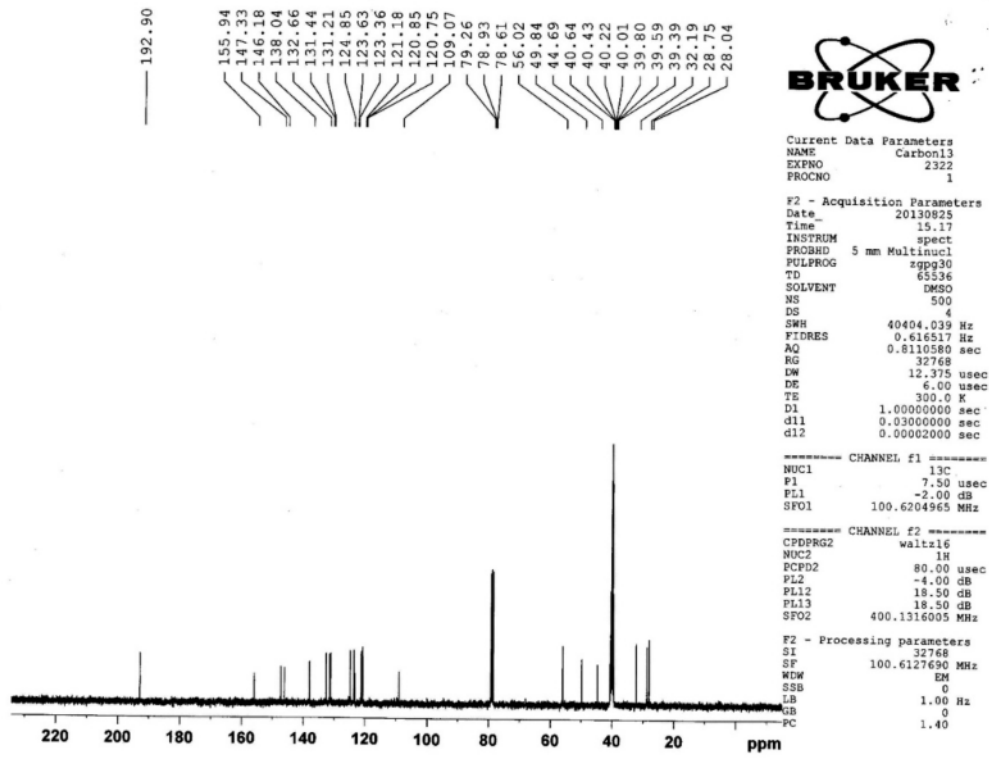

<sup>13</sup>CNMR Spectrum

File : C:\MSDCHEM\4\DATA\64013569.D  
 Operator :  
 Acquired : 4 Jan 1980 1:53 using AcqMethod TEST ARI  
 Instrument : Instrumen  
 Sample Name: M5  
 Misc Info :  
 Vial Number: 1

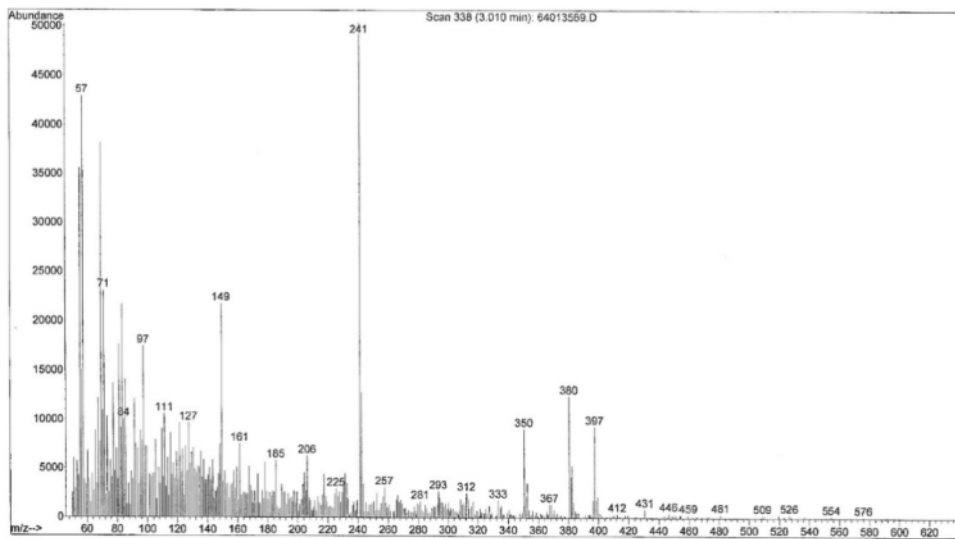

EI-MASS Spectrum

3,3-dimethyl-2,3,4,5,10,11-hexahydro-11-[(4-methyl)phenyl]-1H-dibenzo[b,e][1,4]diazepin-1-one(**3j**):

Pale green solid

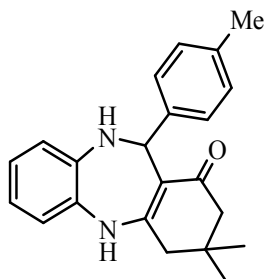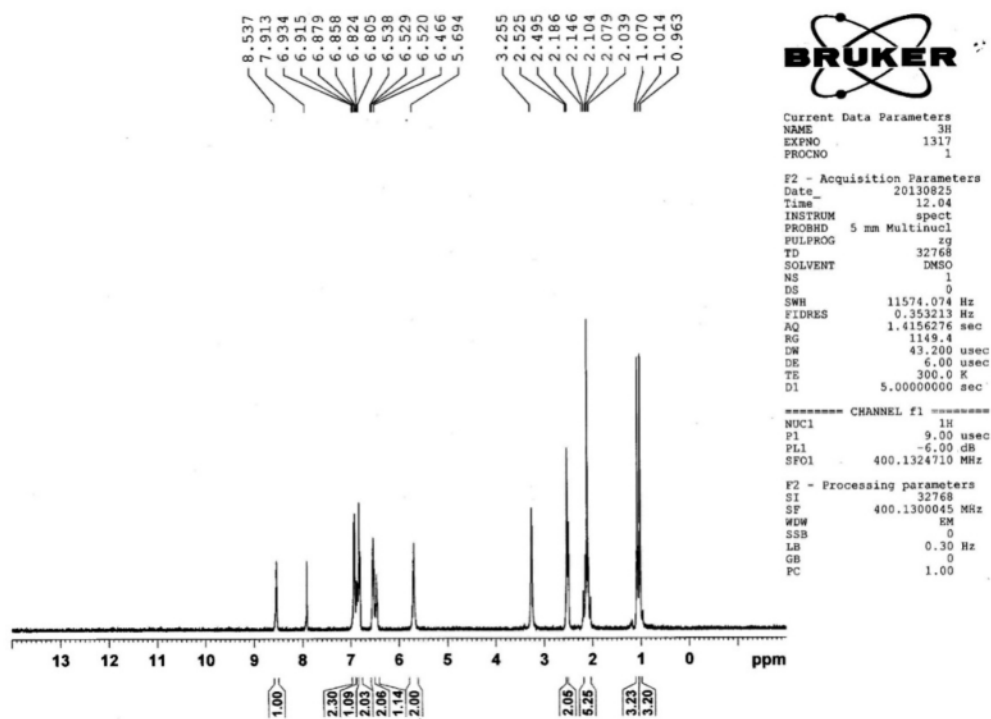

<sup>1</sup>H NMR Spectrum

3,3-dimethyl-2,3,4,5,10,11-hexahydro-11-[(4-methoxy)phenyl]-1H-dibenzo[b,e][1,4]diazepin-1-one(**3k**):

Pale cream solid

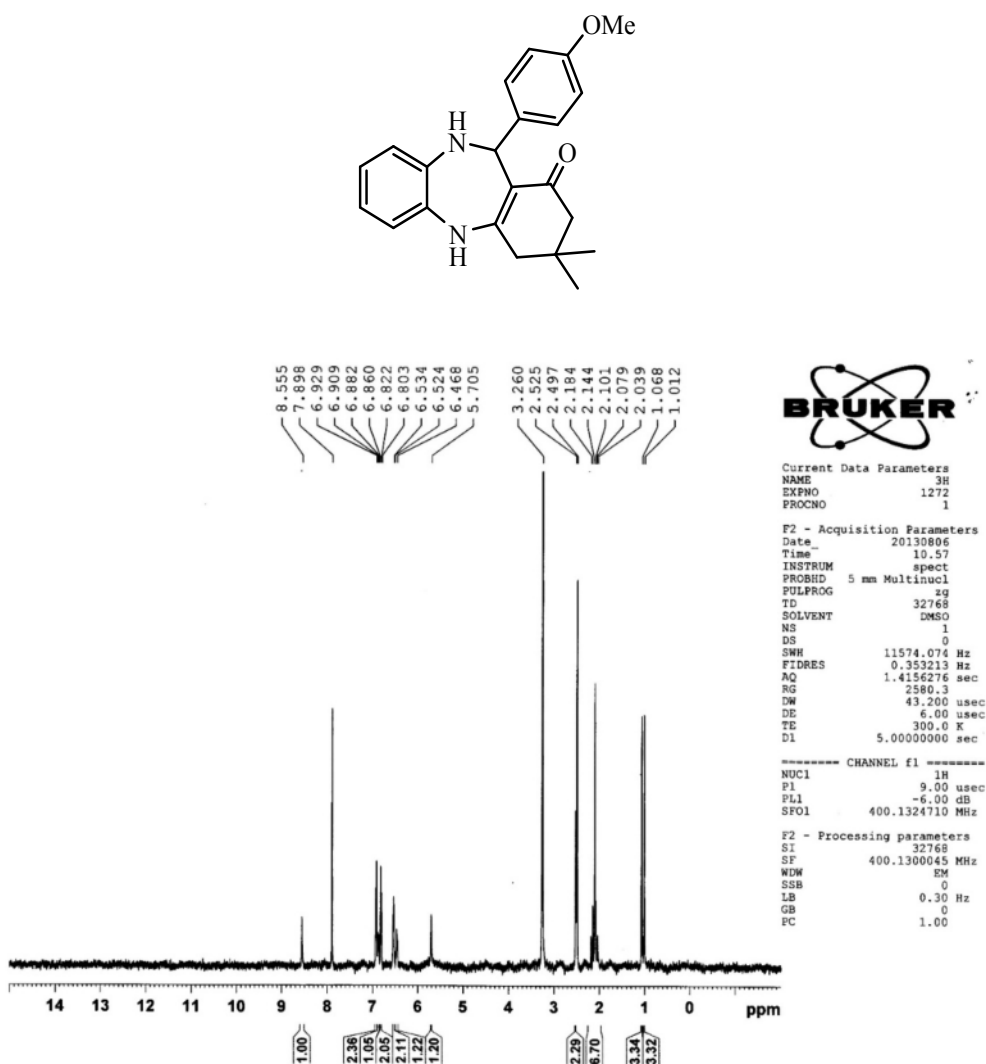

<sup>1</sup>H NMR Spectrum

3,3-dimethyl-2,3,4,5,10,11-hexahydro-11-[(2-methoxy)phenyl]-1H-dibenzo[b,e][1,4]diazepin-1-one (**31**):

Pale cream solid

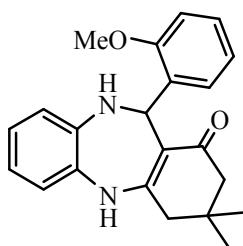

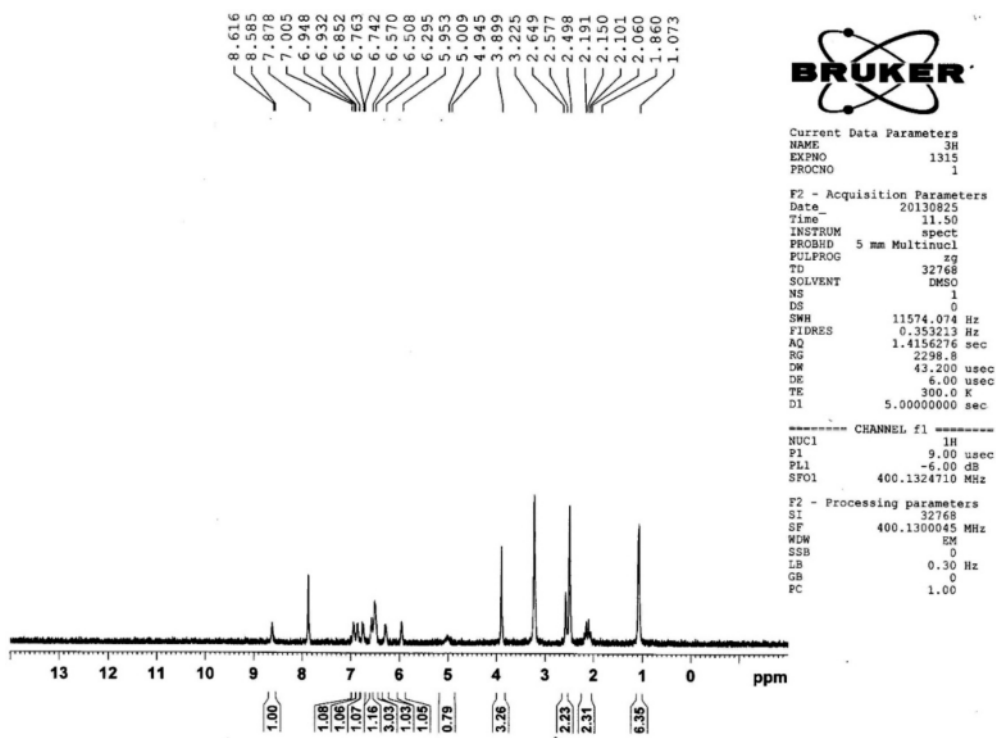

<sup>1</sup>H NMR Spectrum

3,3-dimethyl-2,3,4,5,10,11-hexahydro-11-[(3-methoxy)phenyl]-1H-dibenzo[b,e][1,4]diazepin-1-one (**3m**):

Pale green solid

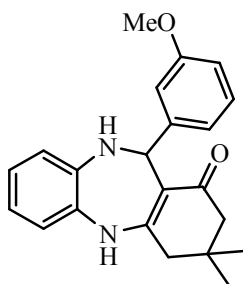

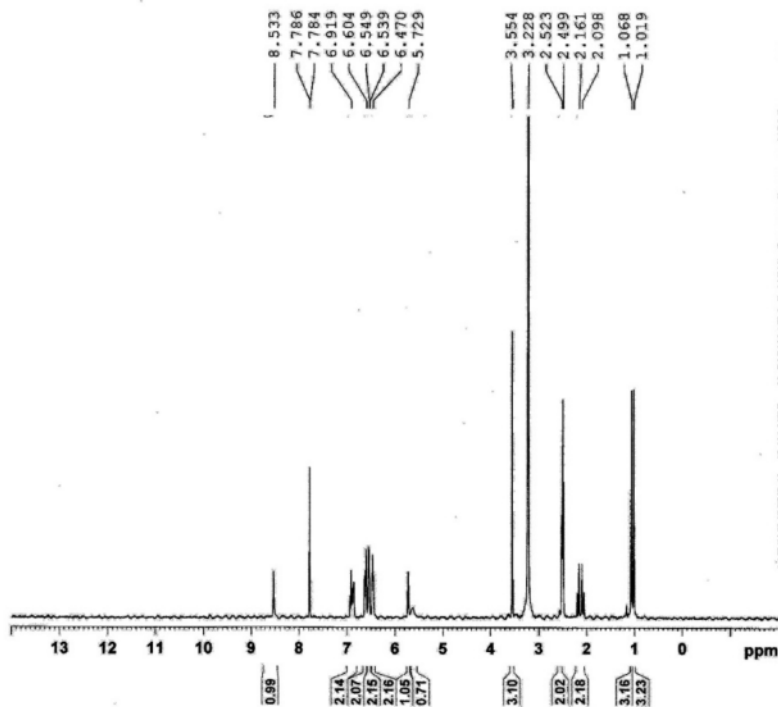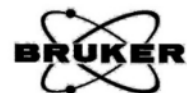

```

Current Data Parameters
NAME      3H
EXPNO    1248
PROCNO    1

F2 - Acquisition Parameters
Date_    20130805
Time     10.05
INSTRUM  spect
PROBHD   5 mm Multinucl
PULPROG  zg
TD        32768
SOLVENT  DMSO
NS        1
DS        0
SWH      11574.074 Hz
FIDRES   0.353213 Hz
AQ        1.4156276 sec
RG        322.5
DW        43.200 usec
DE        6.00 usec
TE        300.0 K
D1        5.0000000 sec

----- CHANNEL f1 -----
NUC1      1H
P1        9.00 usec
PL1       -6.00 dB
SFO1      400.1324710 MHz

F2 - Processing parameters
SI        32768
SF        400.1300045 MHz
WDW       EM
SSB       0
LB        0.30 Hz
GB        0
PC        1.00
  
```

<sup>1</sup>H NMR Spectrum

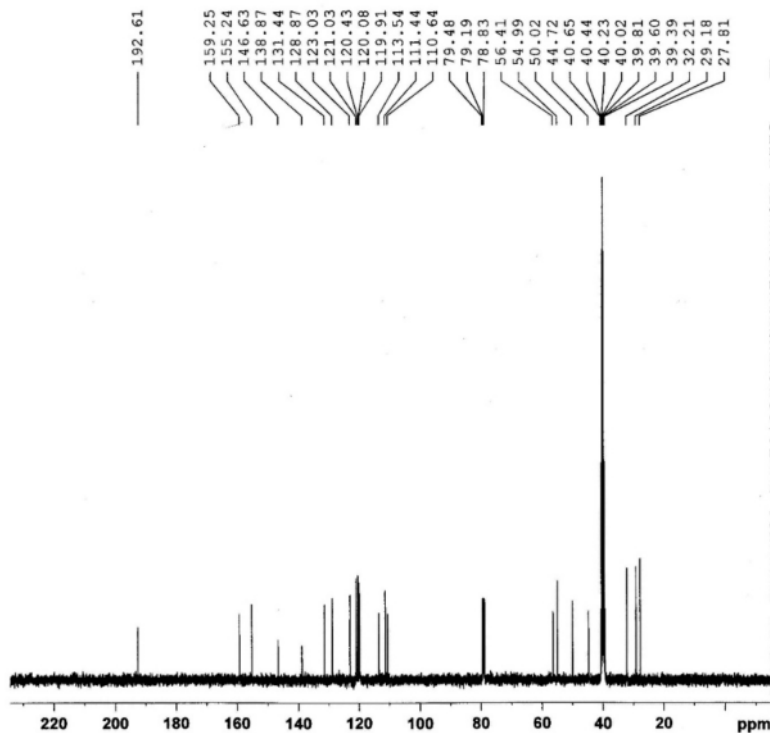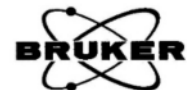

```

Current Data Parameters
NAME      Carbon13
EXPNO    2333
PROCNO    1

F2 - Acquisition Parameters
Date_    20130828
Time     8.26
INSTRUM  spect
PROBHD   5 mm Multinucl
PULPROG  zgpg30
TD        65536
SOLVENT  DMSO
NS        4
DS        4
SWH      40404.039 Hz
FIDRES   0.616517 Hz
AQ        0.8110580 sec
RG        32768
DW        12.373 usec
DE        6.00 usec
TE        300.0 K
D1        1.0000000 sec
d11       0.0300000 sec
d12       0.0000200 sec

----- CHANNEL f1 -----
NUC1      13C
P1        7.50 usec
PL1       -2.00 dB
SFO1      100.6204965 MHz

----- CHANNEL f2 -----
CPDPRG2  waltz16
NUC2      1H
PCPD2    80.00 usec
PL2       -4.00 dB
PL12     18.50 dB
PL13     18.50 dB
SFO2      400.1316005 MHz

F2 - Processing parameters
SI        32768
SF        100.6127690 MHz
WDW       EM
SSB       0
LB        1.00 Hz
GB        0
PC        1.40
  
```

<sup>13</sup>C NMR Spectrum



File : C:\MSDCHEM\4\DATA\64013571.D  
Operator :  
Acquired : 4 Jan 1980 1:58 using AcqMethod TEST ARI  
Instrument : Instrumen  
Sample Name: M13  
Misc Info :  
Vial Number: 1

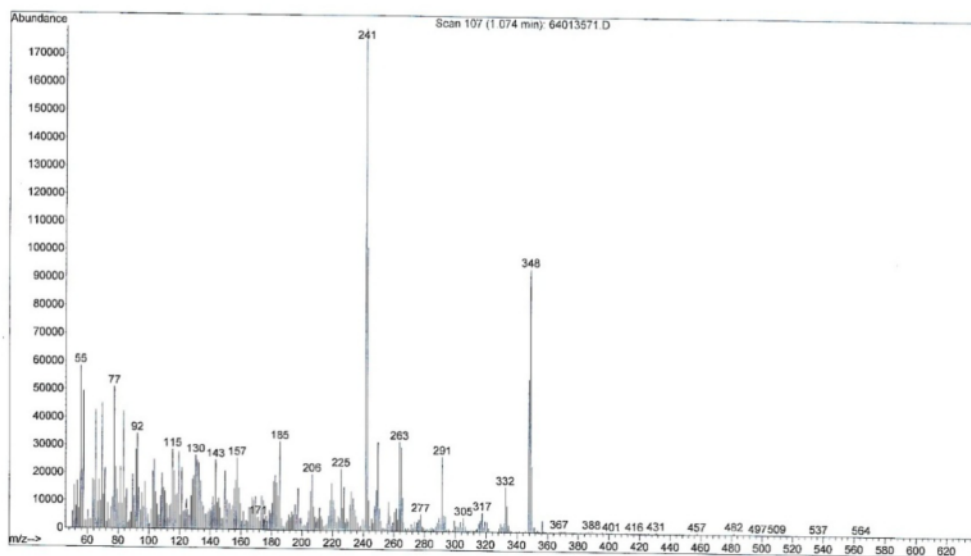

EI-MASS Spectrum

3,3-dimethyl-2,3,4,5,10,11-hexahydro-11-[(2-hydroxy)phenyl]-1H-dibenzo[b,e][1,4]diazepin-1-one(3n):

Pale cream solid

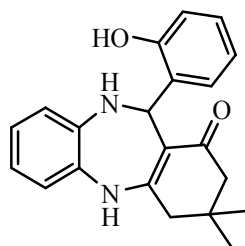

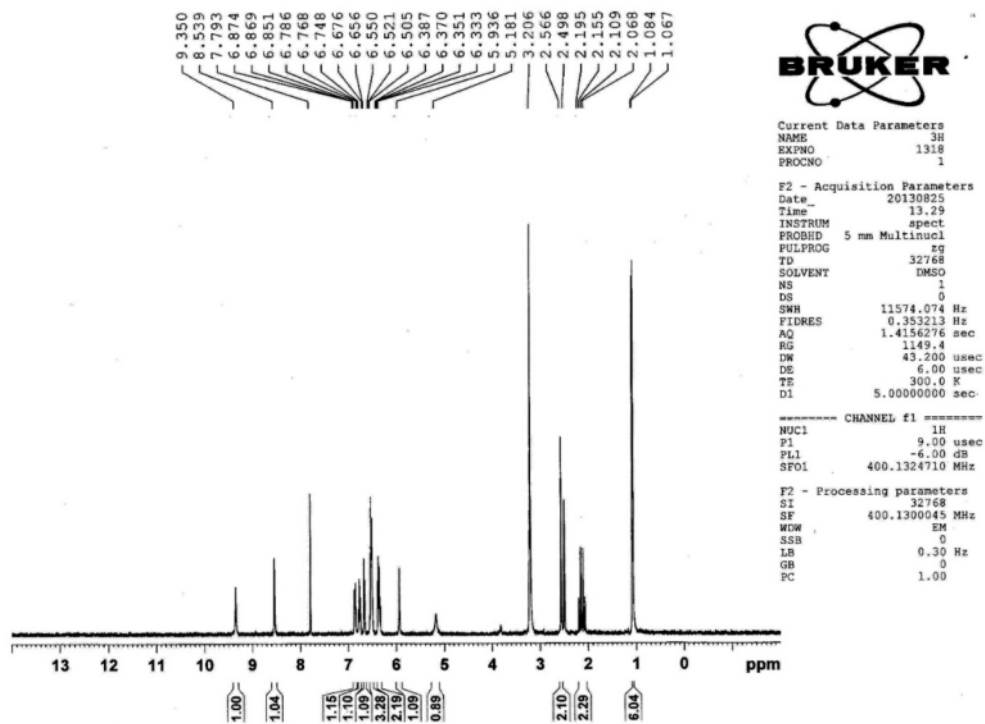

<sup>1</sup>H NMR Spectrum

3,3-dimethyl-2,3,4,5,10,11-hexahydro-11-[(3-hydroxy)phenyl]-1H-dibenzo[b,e][1,4]diazepin-1-one(**30**):

Pale green solid

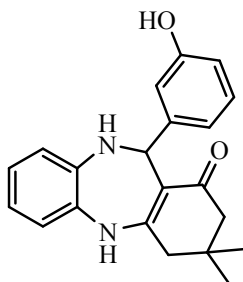

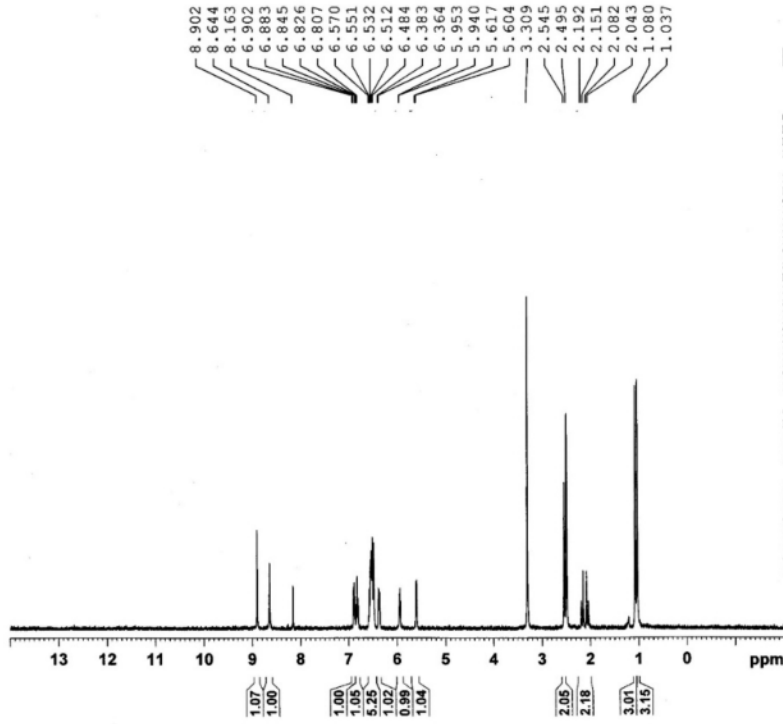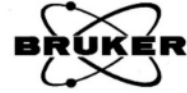

Current Data Parameters  
 NAME 3H  
 EXPNO 1319  
 PROCNO 1

F2 - Acquisition Parameters  
 Date\_ 20130825  
 Time 13.33  
 INSTRUM spect  
 PROBHD 5 mm Multinucl  
 PULPROG zg  
 TD 32768  
 SOLVENT DMSO  
 NS 1  
 DS 0  
 SWH 11574.074 Hz  
 FIDRES 0.353213 Hz  
 AQ 1.4156276 sec  
 RG 1149.4  
 DW 43.200 usec  
 DE 6.00 usec  
 TE 300.0 K  
 D1 5.0000000 sec

==== CHANNEL f1 =====  
 NUC1 1H  
 P1 9.00 usec  
 PL1 -6.00 dB  
 SFO1 400.1324710 MHz

F2 - Processing parameters  
 SI 32768  
 SF 400.1300045 MHz  
 WDW EM  
 SSB 0  
 LB 0.30 Hz  
 GB 0  
 PC 1.00

<sup>1</sup>H NMR Spectrum

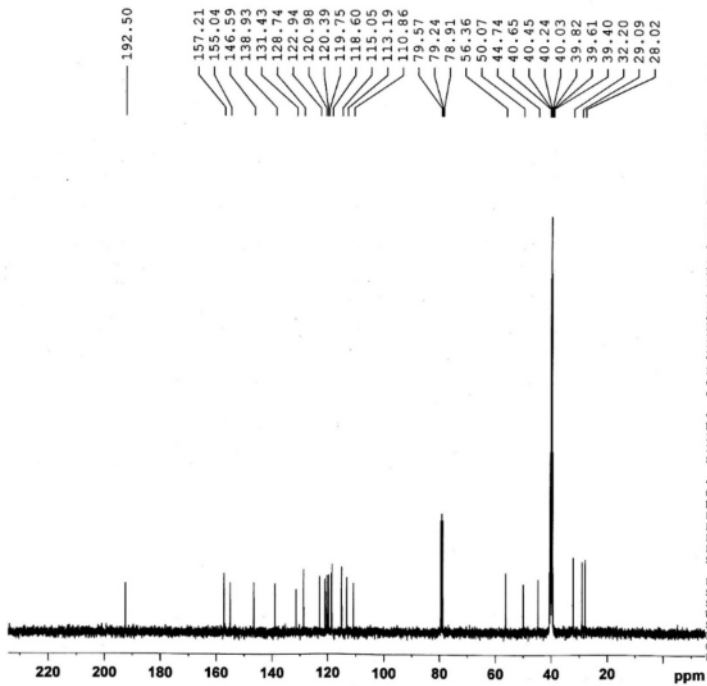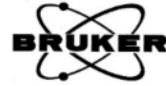

Current Data Parameters  
 NAME Carbon13  
 EXPNO 2375  
 PROCNO 1

F2 - Acquisition Parameters  
 Date\_ 20130917  
 Time 11.06  
 INSTRUM spect  
 PROBHD 5 mm Multinucl  
 PULPROG zgpg30  
 TD 65536  
 SOLVENT DMSO  
 NS 500  
 DS 4  
 SWH 40404.039 Hz  
 FIDRES 0.616517 Hz  
 AQ 0.811580 sec  
 RG 32768  
 DW 12.375 usec  
 DE 6.00 usec  
 TE 300.0 K  
 D1 1.0000000 sec  
 d11 0.0300000 sec  
 d12 0.0002000 sec

==== CHANNEL f1 =====  
 NUC1 13C  
 P1 7.50 usec  
 PL1 -2.00 dB  
 SFO1 100.6204965 MHz

==== CHANNEL f2 =====  
 CDPFRG2 waltz16  
 NUC2 1H  
 PCPD2 80.00 usec  
 PL2 -4.00 dB  
 PL12 18.50 dB  
 PL13 18.50 dB  
 SFO2 400.1316005 MHz

F2 - Processing parameters  
 SI 32768  
 SF 100.6127690 MHz  
 WDW EM  
 SSB 0  
 LB 1.00 Hz  
 GB 0  
 PC 1.40

<sup>13</sup>C NMR Spectrum

File : C:\MSDCHEM\4\DATA\64013572.D  
Operator :  
Acquired : 4 Jan 1980 2:00 using AcqMethod TEST ARI  
Instrument : Instrumen  
Sample Name: M15  
Misc Info :  
Vial Number: 1

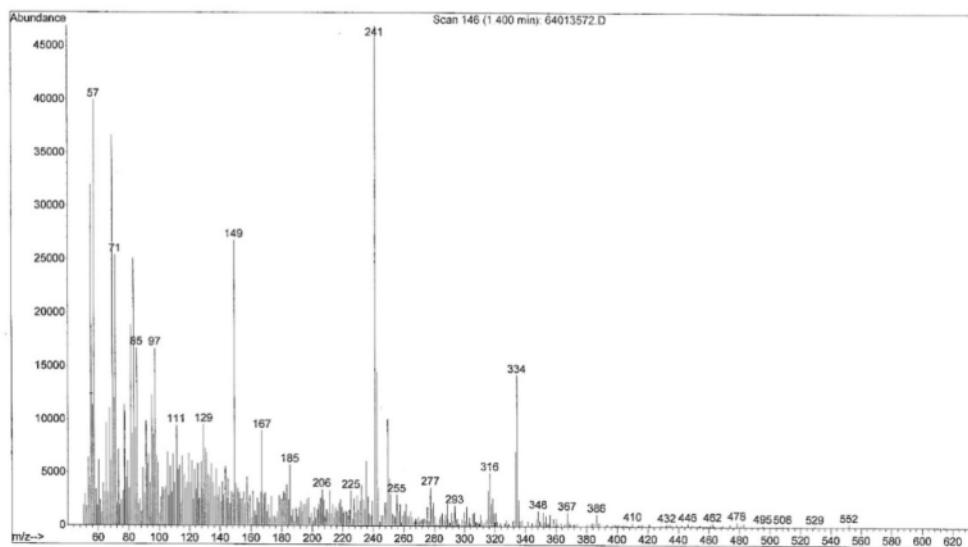

EI-MASS Spectrum
